# Supplementary material for: Spatial structure of TLR4 transmembrane domain in bicelles provides the insight into the receptor activation mechanism
Source: PubMed Central journal article supplement (PMC5537299; doi:10.1038/s41598-017-07250-4), 2017-07-31
Supplement: 41598_2017_7250_MOESM1_ESM.pdf [file 41598_2017_7250_MOESM1_ESM.pdf]

**Spatial structure of TLR4 transmembrane domain in bicelles provides the insight into the receptor activation mechanism.**

*Konstantin S. Mineev, Sergey A. Goncharuk, Marina V. Goncharuk, Pavel E. Volynsky, Ekaterina V. Novikova and Alexander S. Arseniev*

**Supporting data.**

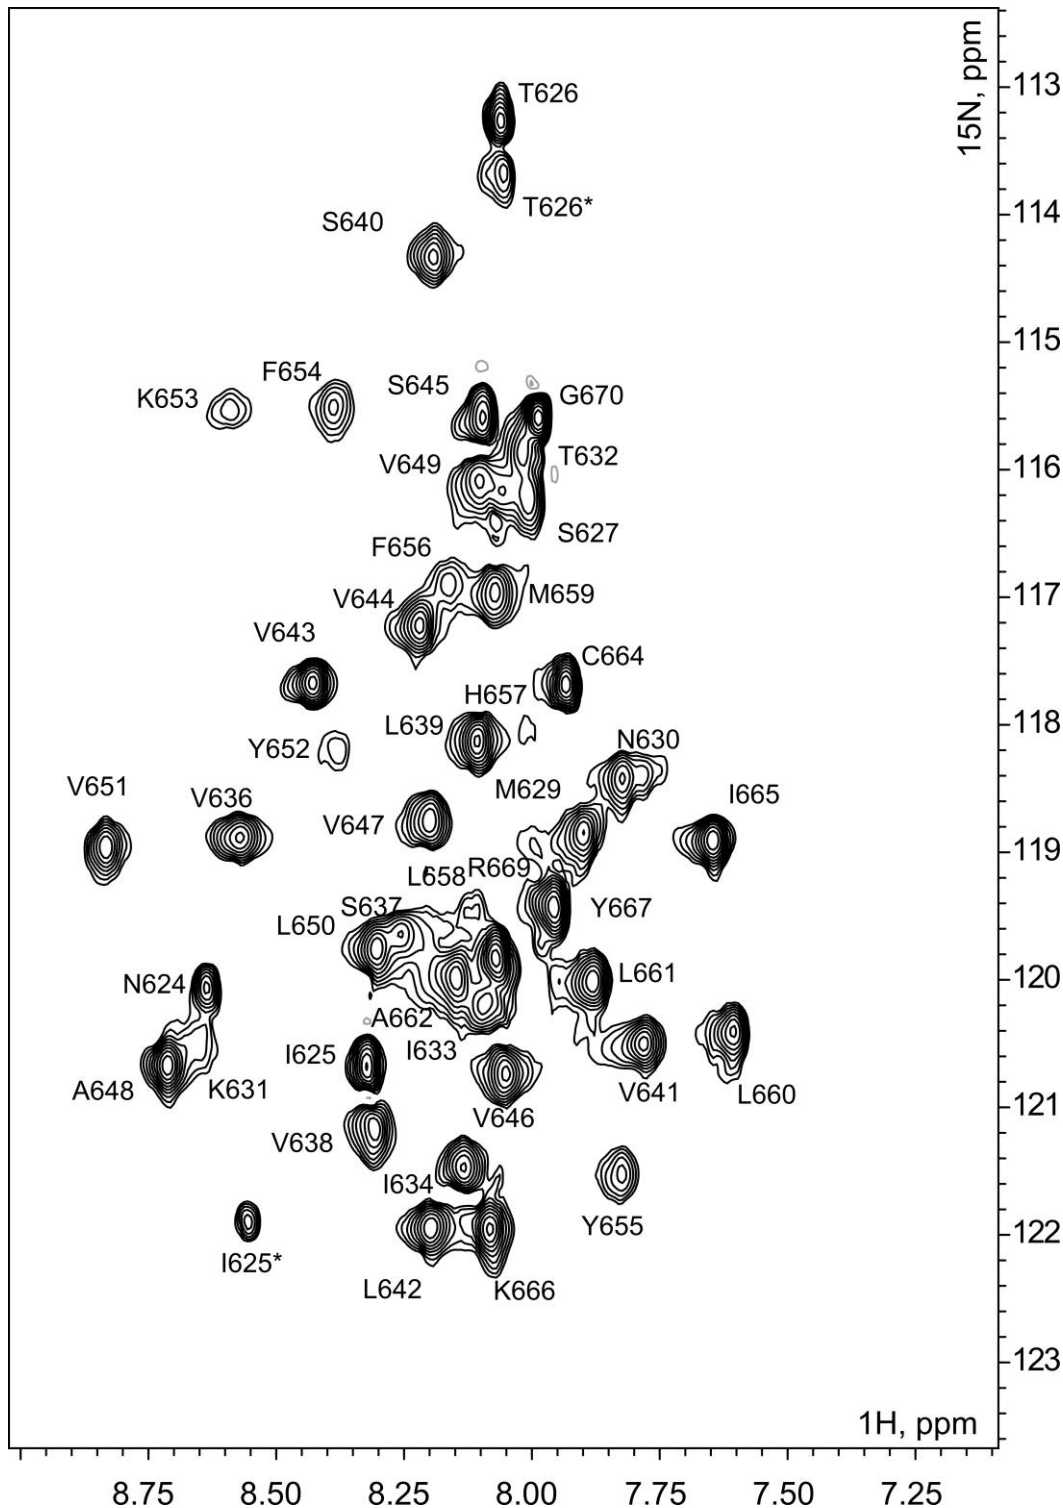

**Figure S1A.** Refers to Figure 1. Fragment of  $^1\text{H},^{15}\text{N}$ -BEST-TROSY spectrum of 0.5 mM TLR4-TM1CL in DPC micelles, recorded at pH 6.0, 40 °C, LPR 140. \* denotes the minor state which is present at the N-terminus of the protein due to the partial formylation of the N-terminal residue.

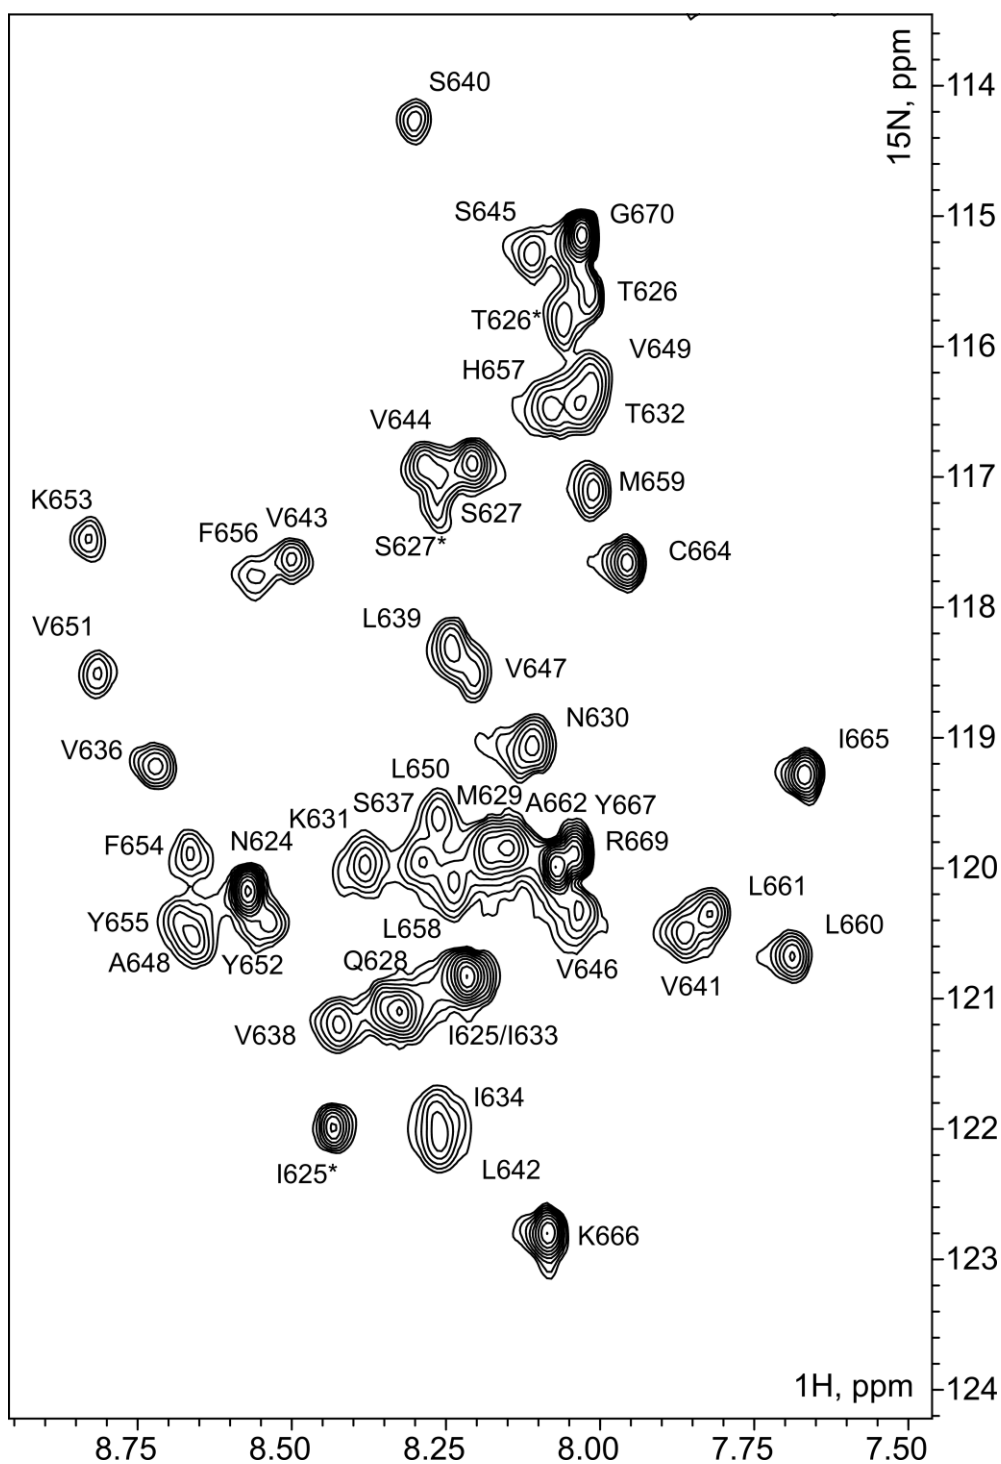

**Figure S1B.** Refers to **Figure 1**. Fragment of  $^1\text{H},^{15}\text{N}$ -BEST-TROSY spectrum of 0.5 mM TLR4-TM1CL in DMPC/DHPC  $q=0.4$  bicelles, recorded at pH 6.0, 40 °C, LPR 200. \* denotes the minor state which is present at the N-terminus of the protein due to the partial formylation of the N-terminal residue.

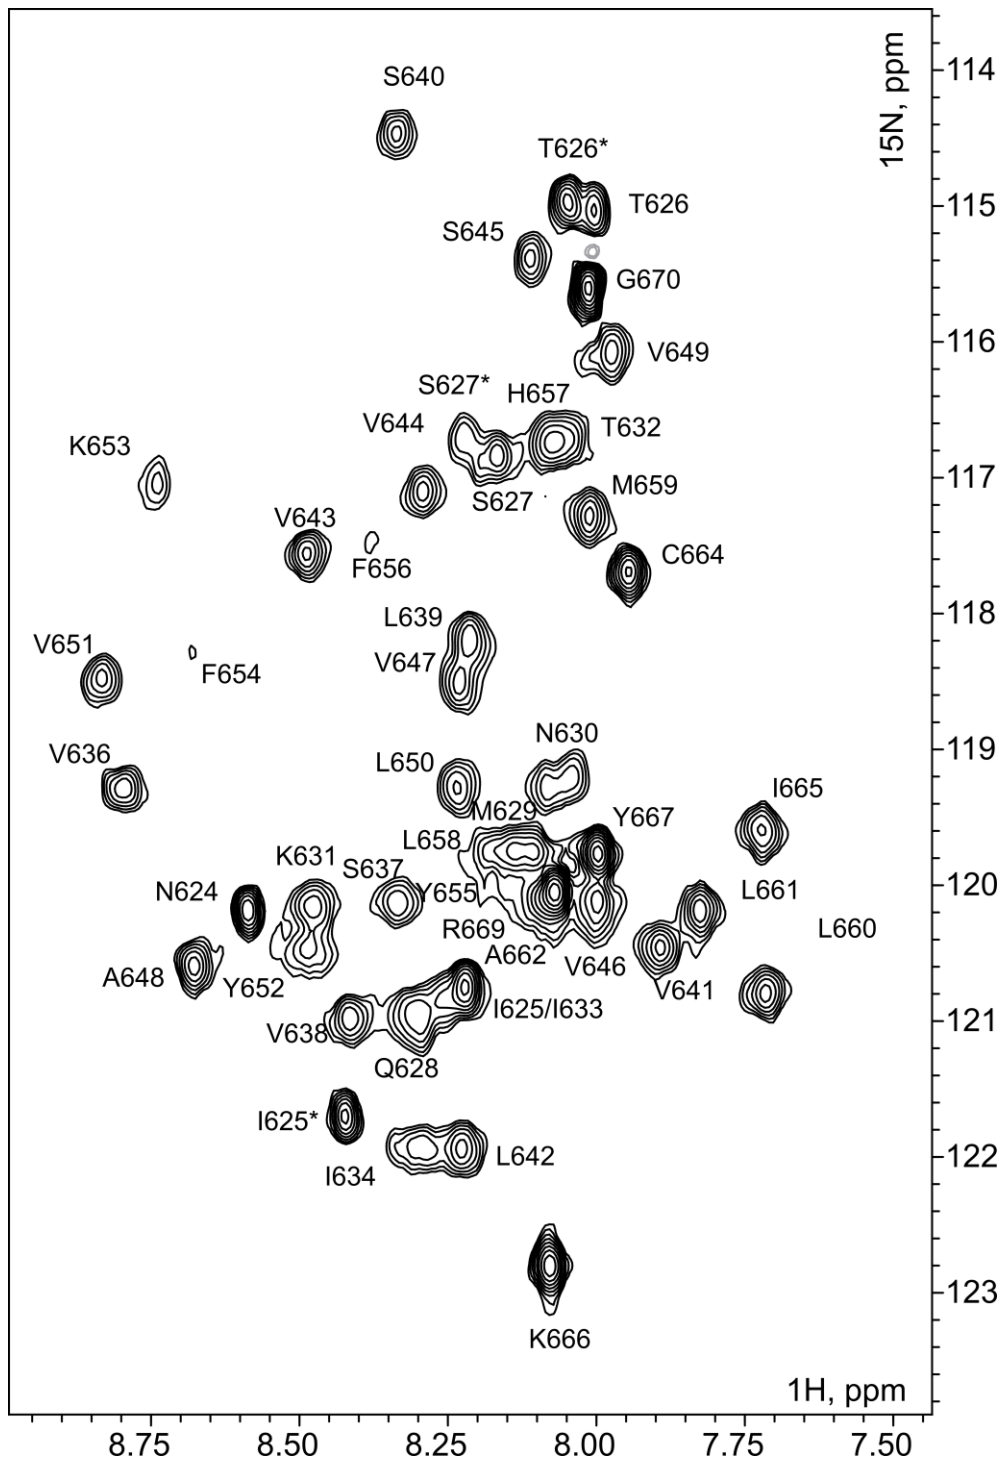

**Figure S1C.** Refers to **Figure 1**. Fragment of  $^1\text{H},^{15}\text{N}$ -BEST-TROSY spectrum of 0.5 mM TLR4-TM1CL in DMPG/DHPC  $q=0.4$  bicelles, recorded at pH 6.5, 40 °C, LPR 200. \* denotes the minor state which is present at the N-terminus of the protein due to the partial formylation of the N-terminal residue.

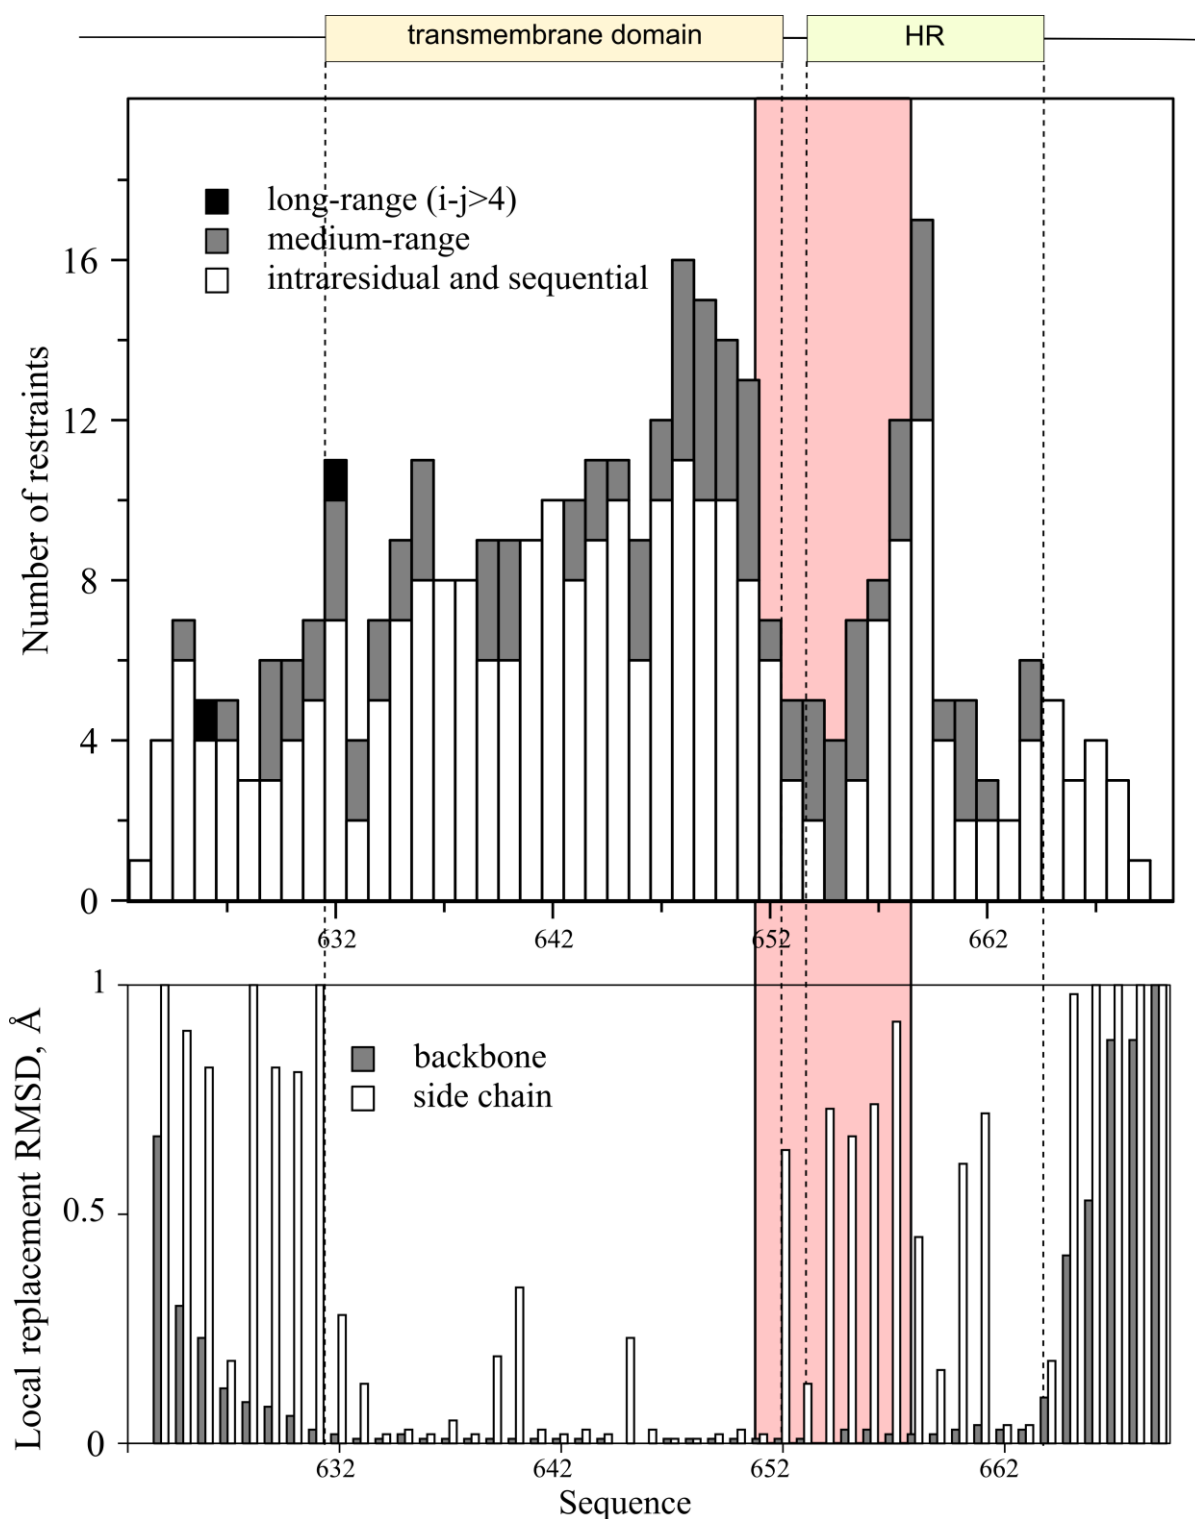

**Figure S2. Refers to Figure 2.** Statistics for the calculated set of spatial structures of TLR4-TM1CL in DMPG/DHPC bicelles. Upper panel shows the number of NOE contacts observed for each residue of TLR4-TM1CL. White bars stand for intraresidual and sequential contacts, gray bars - for medium-range contacts and black bars – for long-range contacts. Lower panel shows the local replacement backbone (gray bars) and side-chain (white bars) RMSD relative to the mean structure, as calculated by MOLMOL software in the set of 10 NMR structures of TLR4-TM1CL. The discussed in the main text region 652-657 is highlighted by red. RMSD values greater than 1 Å are cut.

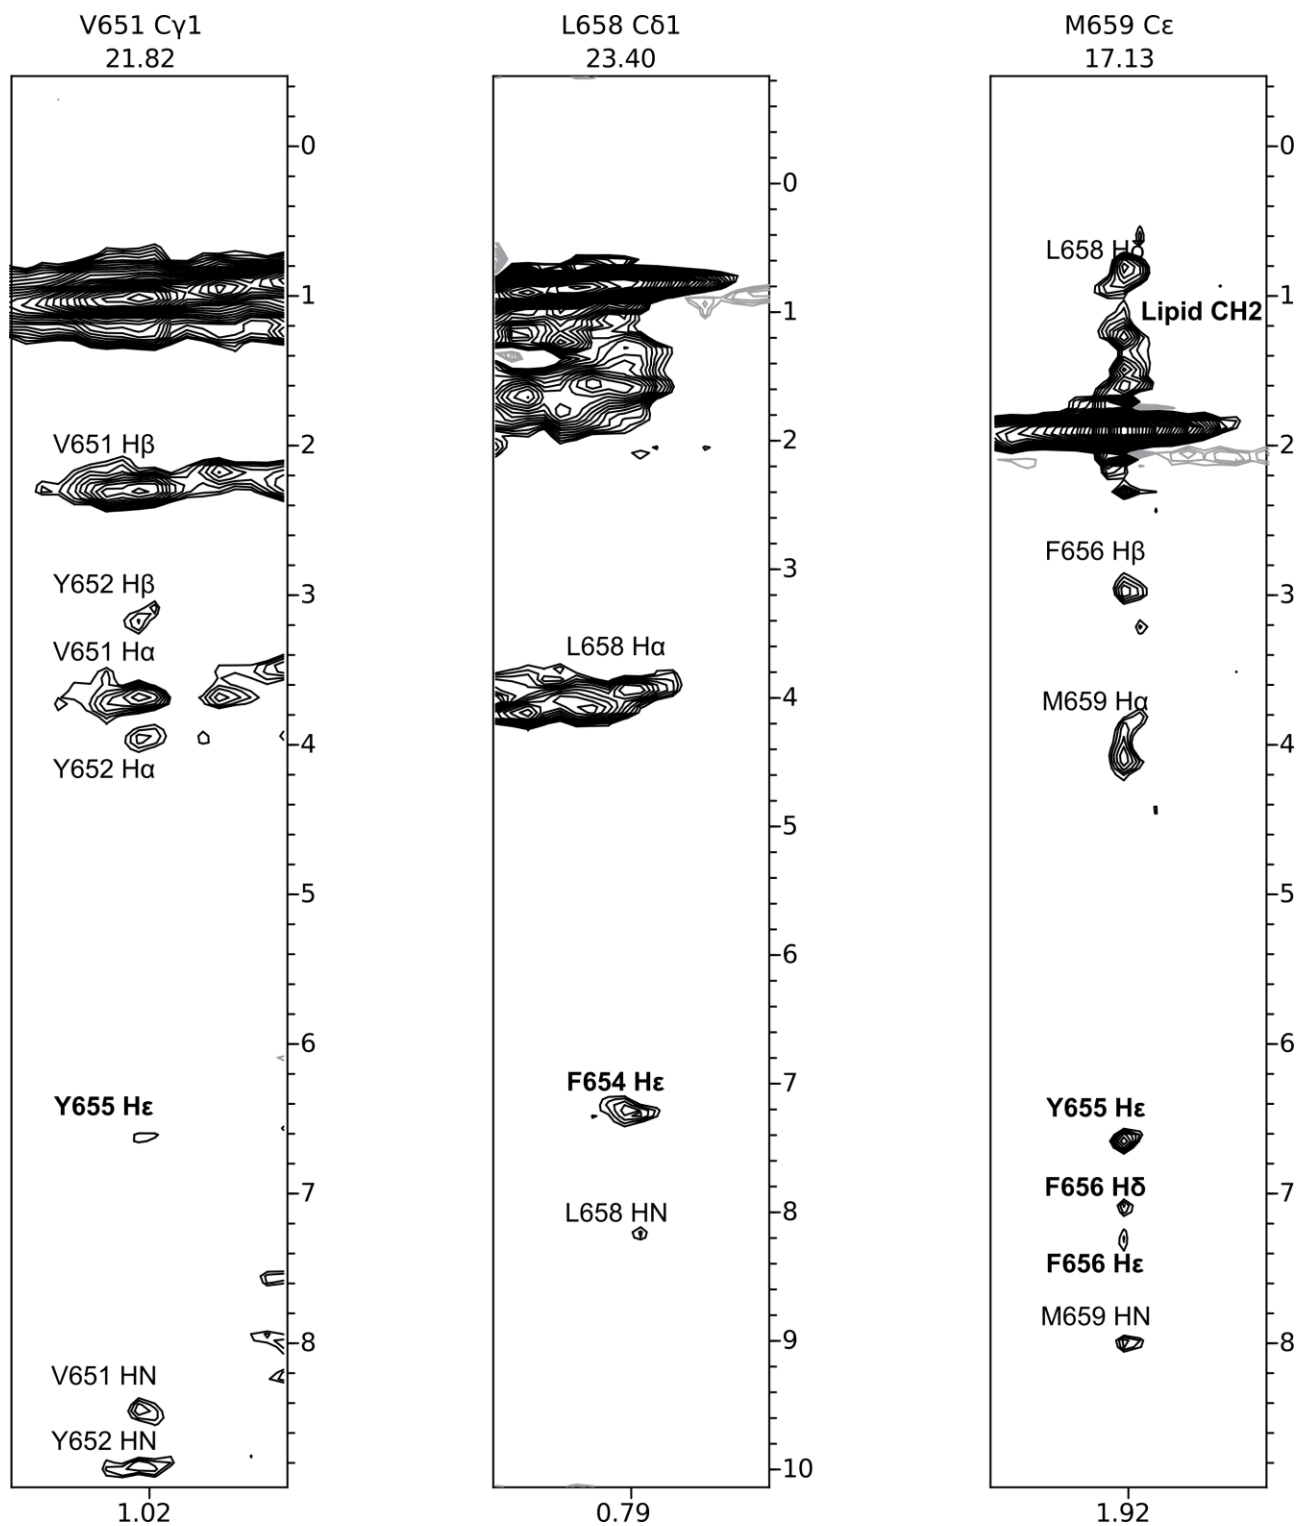

**Figure S3.** Refers to Figure 2. 2 D strips from the 3D  $^1\text{H},^{13}\text{C}$ -NOESY-HSQC spectrum of TLR4-TM1CL in DMPG/DHPC  $q=0.4$  bicelles, recorded at pH 6.5, 40 °C, LPR 200. Strips correspond to the signals from the methyl groups of residues V651, L658 and M659. Assignments of NOE contacts are shown.

**Table S1.** Statistics for the input NMR data and results of spatial structure calculations for TLR4-TM and TLR4-TMICL.

| <b>NMR distance &amp; dihedral restraints</b> |                            |                            |
|-----------------------------------------------|----------------------------|----------------------------|
| TLR4 construct                                | TMICL                      | TM                         |
| Total unambiguous NOE restraints              | 206                        | 225                        |
| intra-residue                                 | 64                         | 95                         |
| inter-residue                                 | 143                        | 130                        |
| sequential ( $ i-j =1$ )                      | 101                        | 53                         |
| medium-range ( $1< i-j \leq 4$ )              | 42                         | 77                         |
| long-range ( $ i-j >4$ )                      | 0                          | 0                          |
| Hydrogen bond restraints (upper/lower)        | 60/60                      | 63/63                      |
| Total torsion angle restraints                | 85                         | 62                         |
| backbone $\phi$                               | 33                         | 25                         |
| backbone $\psi$                               | 33                         | 25                         |
| side chain $\chi^1$                           | 19                         | 12                         |
| <b>Structure calculation statistics</b>       |                            |                            |
| CYANA target function* ( $\text{\AA}^2$ )     | 1.05 $\pm$ 0.08            | 0.84 $\pm$ 0.15            |
| Restraint violations*                         |                            |                            |
| distance ( $>0.2 \text{\AA}$ )                | 4*                         | 3                          |
| distance ( $>0.3 \text{\AA}$ )                | 0                          | 0                          |
| dihedral ( $>5^\circ$ )                       | 0                          | 0                          |
| Average pairwise RMSD ( $\text{\AA}$ )        |                            |                            |
| $\alpha$ -helical region backbone atoms       | 631-663<br>0.40 $\pm$ 0.13 | 631-656<br>0.34 $\pm$ 0.21 |
| all heavy atoms                               | 0.86 $\pm$ 0.12            | 0.95 $\pm$ 0.19            |
| Ramachandran analysis**                       |                            |                            |
| % residues in most favored regions            | 88.4                       | 90.6                       |
| % residues in additional allowed regions      | 11.6                       | 9.4                        |
| % residues in generally allowed regions       | 0                          | 0                          |
| % residues in disallowed regions              | 0                          | 0                          |

\* violated restraints refer to the terminal residues of the protein with high intramolecular mobility and appear due to the high dynamic range and a large number of broad residues with weak cross-peak in NOESY that affect the calibration

\*\*Ramachandran analysis and helix-helix contact area calculations were performed with PDBsum (<http://www.ebi.ac.uk/pdbsum/>)

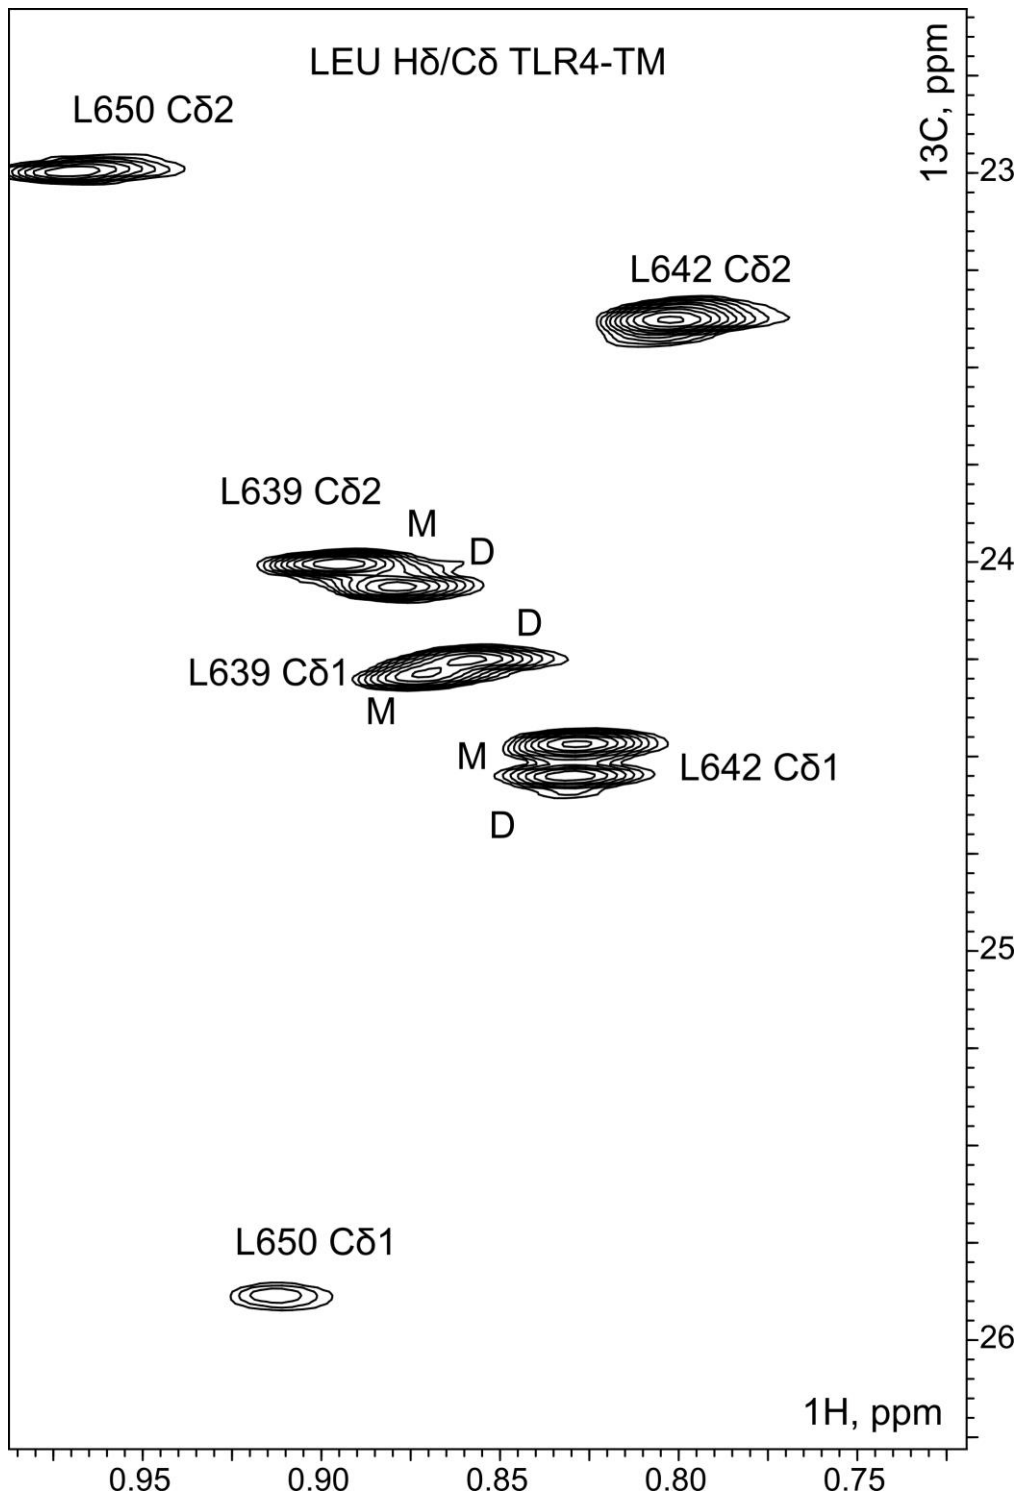

**Figure S4. Refers to Figure 3.** Fragment from the constant-time  $^1\text{H},^{13}\text{C}$ -HSQC spectrum of TLR4-TM (pH 6.0, 40 °C, LPR 60). Fragment contains all signals from the protein methyl groups of Leu sidechains. Assignment of signals to monomeric and dimeric states is indicated by letters M and D, respectively. Constant-time delay was equal to 84.9 ms to obtain the maximal resolution, while retaining the sensitivity.

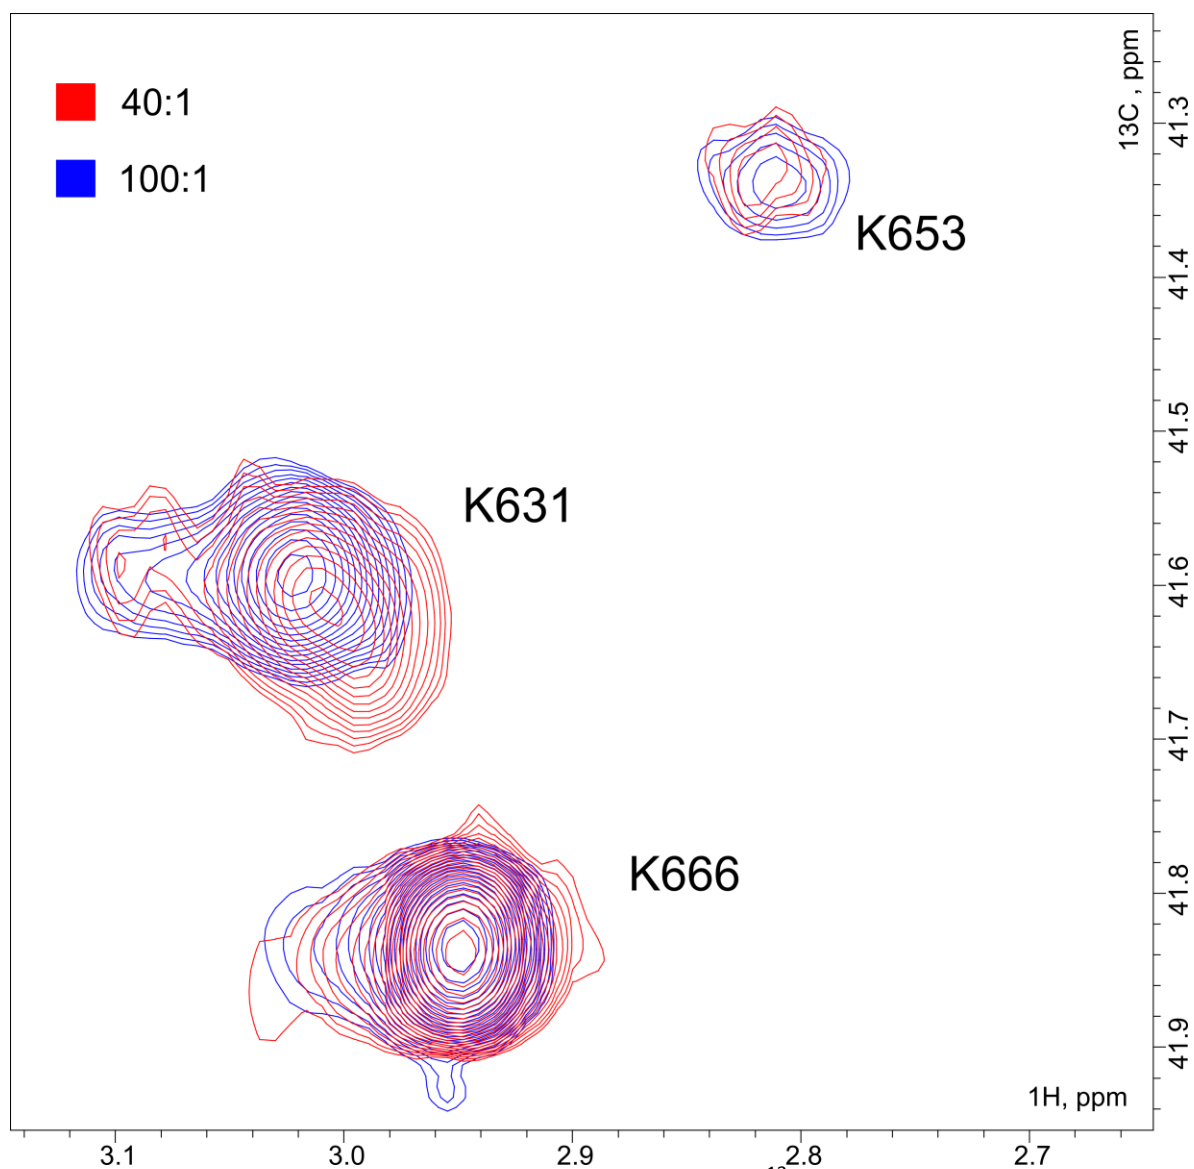

**Figure S5. Refers to Figure 4.** Overlay of the region of  $^{13}\text{C}$ -CT-HSQC spectra (CT delay is equal to 56.6 ms) of TLR4-TM1CL in DPC micelles, recorded at LPR 40 (dimer-monomer equilibrium, shown in red) and 100 (pure monomer, shown in blue). Region contains the cross-peaks, corresponding to  $\text{C}\epsilon\text{H}\epsilon$  groups of lysine residues; assignment of cross-peaks is indicated. No chemical shift changes are observed for the K653 side-chain upon the dimerization, which contradicts the Model 2 (Figure 4B in the main text). At the same time, side-chain of K631, which is at the N-terminus of TM  $\alpha$ -helix, reveals the slightly perturbed chemical shifts due to the dimerization of TLR4-TM1CL.
